# Supplementary material for: Reversal of Right Ventricular Hypertrophy and Dysfunction by Prostacyclin in a Rat Model of Severe Pulmonary Arterial Hypertension
Source: MDPI journal article supplement (doi:10.3390/ijms23105426), 2022-05-12
Supplement: s1 [file s1]

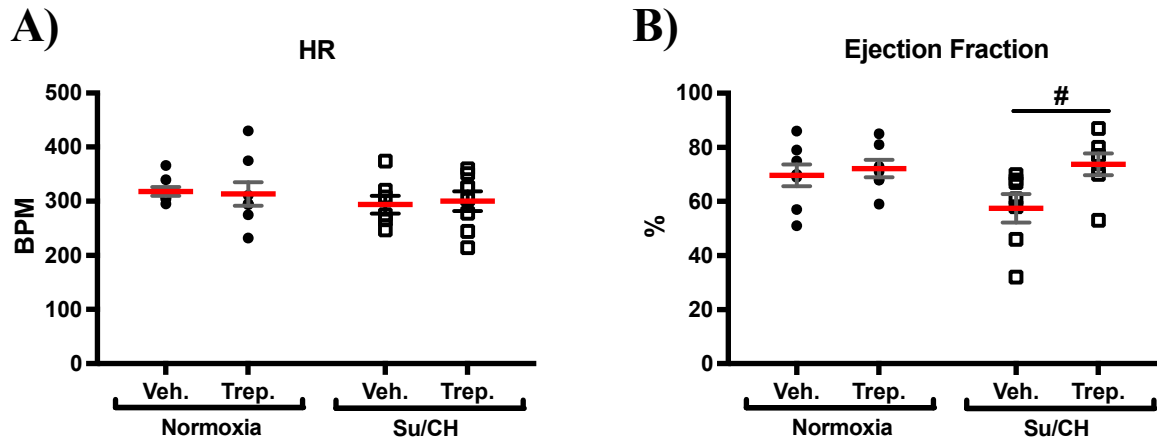

**Figure S1. RV function parameters upon SuCH and treprostinil treatment.** Individual value grouped plots of (A) heart rate (HR) and (B) RV ejection fraction (EF); n=7-8 animals/experimental group; \*, \$ and # present significance vs. SuCH+Veh.; #  $P \leq 0.05$ .

|                                            |          |        |       |        |        |          |        |         |         |
|--------------------------------------------|----------|--------|-------|--------|--------|----------|--------|---------|---------|
| <b>List of<br/>RNA<br/>array<br/>genes</b> |          |        |       |        |        |          |        |         |         |
| Cdca5                                      | Cdkn1a   | Cdkn1b | Zeb1  | Col1a1 | Col1a2 | Col3a1   | Eif4e  | Rps6kb1 | Akt2    |
| Dnm1                                       | Slc9a3r1 | Esr1   | Akt1  | Fas    | Faslg  | Fis1     | Fn1    | Grb2    | Gak3b   |
| Hes1                                       | Hey1     | Hey2   | Hlf1a | Camk2a | Icam1  | Mylk     | IL10   | IL13    | IL13ra2 |
| IL1a                                       | IL1b     | IL4    | Rheb  | IL6    | IL6r   | Nppb     | Nppa   | Lats1   | Lats2   |
| Lpl                                        | Snai3    | Snai2  | Mapk1 | Mapk8  | Myc    | Prkaa1   | Nf2    | Slc9a1  | Slc9a3  |
| Notch1                                     | Nox1     | Cybb   | Nox4  | Ntrk1  | ulk1   | Ulk2     | Atg7   | Nsfl1c  | Pcna    |
| Tfeb                                       | Pparg    | Prkaca | Snai1 | Ryr2   | Scn5a  | Serpine1 | Sp1    | Src     | Srebf1  |
| Rhoa                                       | Taz      | Tbx20  | Tgfa  | Tgfb1  | Tgfb2  | Tgfb3    | Tgfbr1 | Tgfbr2  | Colg4a1 |
| Tle3                                       | Tle4     | Tnf    | Txn1  | Ucp1   | Ucp2   | Ucp3     | Vegfa  | Ccn4    | Wnt1    |
| Wnt2b                                      | Wnt3a    | Wnt5a  | Wnt6  | Yap1   | Ywhaz  | Slc9a3r2 | Prkca  | Actb    | gapdh   |
| hsp90ab1                                   |          |        |       |        |        |          |        |         |         |

**Figure S2. List of genes included in our custom RNA array.**
